# Supplementary material for: Clinical, Socioeconomic, and Psychosocial Factors Associated with Blood Pressure Control and Adherence: Results from a Multidisciplinary Cardiovascular National Program Providing Universal Coverage in a Developing Country
Source: PubMed Central journal article supplement (PMC6077571; doi:10.1155/2018/5634352), 2018-07-09
Supplement: 5634352.f1.pdf [file 5634352.f1.pdf]

**Supplementary Table.** Multivariable adjusted odds ratio for no adherence risk to antihypertensive drug therapy using Morisky-Green-Levine-4 items questionnaire in patients followed in the Cardiovascular Health Program. Association with outcomes using two different definitions of no adherence according to the score (> 1 vs. > 2).

|                                                                                                                                                                                                                                                                                                                                                                                                                                                                                                                                                                 | Odds Ratio* (CI 95%) for<br>No adherence<br>(Morisky score >1)<br>No adherence 61.6% (n= 611) | Odds Ratio* (CI 95%) for<br>No adherence<br>(Morisky score >2)<br>No adherence 38.2% (n=379) |
|-----------------------------------------------------------------------------------------------------------------------------------------------------------------------------------------------------------------------------------------------------------------------------------------------------------------------------------------------------------------------------------------------------------------------------------------------------------------------------------------------------------------------------------------------------------------|-----------------------------------------------------------------------------------------------|----------------------------------------------------------------------------------------------|
| <b>Demographic and socioeconomic characteristic</b>                                                                                                                                                                                                                                                                                                                                                                                                                                                                                                             |                                                                                               |                                                                                              |
| Age                                                                                                                                                                                                                                                                                                                                                                                                                                                                                                                                                             | 0.99 (0.98 – 1.00)                                                                            | 0.98 (0.97 – 1.00)                                                                           |
| Male sex                                                                                                                                                                                                                                                                                                                                                                                                                                                                                                                                                        | <b>1.54 (1.23 – 1.93)‡</b>                                                                    | <b>1.53 (1.22 – 1.92)‡</b>                                                                   |
| Low education (<8 years of education)                                                                                                                                                                                                                                                                                                                                                                                                                                                                                                                           | 1.06 (0.85 – 1.32)                                                                            | 1.19 (0.96 – 1.48)                                                                           |
| Low family income (<US\$80 per person month)                                                                                                                                                                                                                                                                                                                                                                                                                                                                                                                    | <b>1.39 (1.11 – 1.72)‡</b>                                                                    | <b>1.69 (1.35 – 2.09)‡</b>                                                                   |
| <b>Psychosocial variables</b>                                                                                                                                                                                                                                                                                                                                                                                                                                                                                                                                   |                                                                                               |                                                                                              |
| Inadequate patient –physician relation                                                                                                                                                                                                                                                                                                                                                                                                                                                                                                                          | 1.04 (0.84 – 1.29)                                                                            | 0.95 (0.76 – 1.18)                                                                           |
| High emotional stress-depression score                                                                                                                                                                                                                                                                                                                                                                                                                                                                                                                          | <b>2.15 (1.68 – 2.76)‡</b>                                                                    | <b>1.97 (1.56 – 2.49)‡</b>                                                                   |
| Low social support                                                                                                                                                                                                                                                                                                                                                                                                                                                                                                                                              | <b>1.34 (1.08 – 1.66)‡</b>                                                                    | <b>1.32 (1.06 – 1.63)‡</b>                                                                   |
| Low Knowledge about hypertension                                                                                                                                                                                                                                                                                                                                                                                                                                                                                                                                | 0.98 (0.81 – 1.21)                                                                            | 1.11 (0.91 – 1.36)                                                                           |
| <b>Antihypertensive treatment variables</b>                                                                                                                                                                                                                                                                                                                                                                                                                                                                                                                     |                                                                                               |                                                                                              |
| Uncontrolled BP ( $\geq$ 140/90 mmHg)                                                                                                                                                                                                                                                                                                                                                                                                                                                                                                                           | <b>1.52 (1.22 – 1.90)‡</b>                                                                    | <b>1.85 (1.49 – 2.29)‡</b>                                                                   |
| Multiple antihypertensive RX                                                                                                                                                                                                                                                                                                                                                                                                                                                                                                                                    | 0.92 (0.75 – 1.13)                                                                            | <b>0.78 (0.63 – 0.96)†</b>                                                                   |
| Time of care in CVHP (years)                                                                                                                                                                                                                                                                                                                                                                                                                                                                                                                                    | 0.98 (0.95 – 1.00)                                                                            | 0.98 (0.96 – 1.01)                                                                           |
| Systolic blood pressure baseline in CVHP                                                                                                                                                                                                                                                                                                                                                                                                                                                                                                                        | 1.00 (0.99 – 1.00)                                                                            | 0.99 (0.98 – 1.00)                                                                           |
| Diastolic blood pressure baseline in CVHP                                                                                                                                                                                                                                                                                                                                                                                                                                                                                                                       | 1.00 (0.99 – 1.00)                                                                            | 1.00 (0.99 – 1.01)                                                                           |
| <b>Anthropometrics and clinical variables</b>                                                                                                                                                                                                                                                                                                                                                                                                                                                                                                                   |                                                                                               |                                                                                              |
| Diabetes mellitus                                                                                                                                                                                                                                                                                                                                                                                                                                                                                                                                               | <b>0.81 (0.66 – 0.99)†</b>                                                                    | <b>0.71 (0.58 – 0.87)‡</b>                                                                   |
| Elevated total cholesterol ( $\geq$ 200 mg/dL)                                                                                                                                                                                                                                                                                                                                                                                                                                                                                                                  | <b>1.26 (1.04 – 1.54)†</b>                                                                    | 1.17 (0.96 – 1.43)                                                                           |
| BMI (Kg/m <sup>2</sup> )                                                                                                                                                                                                                                                                                                                                                                                                                                                                                                                                        | 1.00 (0.98 – 1.02)                                                                            | 1.01 (0.99 – 1.03)                                                                           |
| <b>Lifestyle habits</b>                                                                                                                                                                                                                                                                                                                                                                                                                                                                                                                                         |                                                                                               |                                                                                              |
| Smoking (current smoker)                                                                                                                                                                                                                                                                                                                                                                                                                                                                                                                                        | 0.98 (0.78 – 1.22)                                                                            | 1.01 (0.80 – 1.26)                                                                           |
| Alcohol related abnormal behavior                                                                                                                                                                                                                                                                                                                                                                                                                                                                                                                               | 1.18 (0.86 – 1.60)                                                                            | 1.28 (0.95 – 1.72)                                                                           |
| Sedentary                                                                                                                                                                                                                                                                                                                                                                                                                                                                                                                                                       | 0.98 (0.75 – 1.29)                                                                            | <b>1.40 (1.05 – 1.86)†</b>                                                                   |
| †p <0.05, ‡p <0.01. *OR adjusted for all the variables that were significant at the p<0.05 level in unadjusted model: sex (male), low family income <US\$80 per person/month), inadequate patient-physician relation (score $\leq$ 71), high emotional stress-depression (score $\geq$ 7), low social support (score <57), uncontrolled BP ( $\geq$ 140/90 mmHg), multiple antihypertensive RX ( $\geq$ 2 drug antihypertensive), diabetes, elevated total cholesterol ( $\geq$ 200 mg/dL), alcohol related abnormal (score $\geq$ 2) as dichotomous variables. |                                                                                               |                                                                                              |
